# Supplementary material
Source: PubMed Central journal article supplement (PMC4791061)
Supplement: NIHMS765310-supplement-Table.pdf [file NIHMS765310-supplement-Table.pdf]

## S1. left amygdala

| BMapID       | Year | 1st Auth. | Journal                                              | # | Experiment Name                                       | Behavioral Domain                                              | #Loc |
|--------------|------|-----------|------------------------------------------------------|---|-------------------------------------------------------|----------------------------------------------------------------|------|
| 811031<br>1  | 1992 | Zatorre   | Nature                                               | 1 | Odor vs. Odorless                                     | Perception.Olfaction                                           | 6    |
| 30441        | 1993 | George    | Journal of Neuropsychiatry and Clinical Neuroscience | 1 | Facial Identity                                       | Perception.Vision.Shape                                        | 10   |
| 30400        | 1996 | Morris    | Nature                                               | 1 | Fearful - Happy Expressions                           | Emotion.Fear                                                   | 5    |
| 30012        | 1997 | Cabeza    | Neuron                                               | 1 | Item - Temporal Order Memory                          | Cognition.Memory.Explicit                                      | 5    |
| 30265        | 1997 | Rumsey    | Brain                                                | 5 | Fixation - Irregular Pronunciation                    | Cognition.Language.Speech,Action.Execution.Speech              | 24   |
| 30265        | 1997 | Rumsey    | Brain                                                | 6 | Fixation - Pseudoword Pronunciation                   | Cognition.Language.Speech,Action.Execution.Speech              | 21   |
| 30391        | 1997 | Lane      | Neuropsychologia                                     | 2 | Unpleasant vs. Neutral                                | Emotion                                                        | 11   |
| 30413        | 1997 | Reiman    | American Journal of Psychiatry                       | 1 | Film-Generated Emotion minus Film-Control             | Emotion                                                        | 13   |
| 30413        | 1997 | Reiman    | American Journal of Psychiatry                       | 3 | Film-Generated Emotion minus Recall-Generated Emotion | Emotion,Cognition.Memory.Explicit                              | 11   |
| 30260        | 1998 | Jernigan  | NeuroImage                                           | 2 | Fixation > Word Identification                        | Cognition.Language.Speech,Action.Execution.Speech              | 11   |
| 30260        | 1998 | Jernigan  | NeuroImage                                           | 4 | Fixation > Word Recognition                           | Cognition.Memory.Explicit                                      | 9    |
| 30421        | 1998 | Whalen    | Journal of Neuroscience                              | 1 | Masked Fearful vs. Masked Happy                       | Emotion.Fear                                                   | 4    |
| 30459        | 1998 | Taylor    | NeuroImage                                           | 1 | Encoding, Negative - Neutral                          | Emotion                                                        | 2    |
| 709025<br>5  | 1998 | LaBar     | Neuron                                               | 1 | Early Acquisition                                     | Cognition.Attention,Emotion.Fear                               | 7    |
| 709025<br>5  | 1998 | LaBar     | Neuron                                               | 3 | Early Extinction                                      | Emotion.Fear,Cognition.Attention                               | 6    |
| 30028        | 1999 | Hamann    | Nature Neuroscience                                  | 2 | Aversive vs. Neutral Pictures                         | Emotion.Disgust                                                | 6    |
| 30346        | 1999 | Crosson   | Neuroreport                                          | 1 | Emotionally Evocative Words - Repetition              | Emotion,Cognition.Language.Semantics,Cognition.Language.Speech | 12   |
| 709025<br>3  | 1999 | Buchel    | Journal of Neuroscience                              | 2 | Time x Condition Interaction                          | Cognition.Attention                                            | 4    |
| 806014<br>5  | 1999 | Henson    | Journal of Neuroscience                              | 4 | New > Know Responses, (Retrieval + Encoding)          | Cognition.Memory.Explicit                                      | 12   |
| 101002<br>28 | 1999 | Rogers    | Journal of Neuroscience                              | 2 | Control - (4:2 + 5:1)                                 | Cognition,Emotion                                              | 8    |
| 101002<br>28 | 1999 | Rogers    | Journal of Neuroscience                              | 6 | Control-(5:1)                                         | Cognition,Emotion                                              | 4    |

|         |      |           |                                                 |   |                                                     |                                                        |    |
|---------|------|-----------|-------------------------------------------------|---|-----------------------------------------------------|--------------------------------------------------------|----|
| 30031   | 2000 | Hui       | Human Brain Mapping                             | 2 | Acupuncture LI 4 vs. Tactile Stimulation, Decreases | Perception.Somesthesis                                 | 20 |
| 30138   | 2000 | Hariri    | Neuroreport                                     | 3 | Match vs. Label                                     | Emotion                                                | 3  |
| 30138   | 2000 | Hariri    | Neuroreport                                     | 5 | PPI Analysis-Positively Correlated                  | Emotion                                                | 3  |
| 30149   | 2000 | Kuperberg | Journal of Cognitive Neuroscience               | 2 | Random Word Strings > Normal Sentences              | Cognition.Language.Semantics,Cognition.Language.Syntax | 15 |
| 30177   | 2000 | Sobel     | Journal of Neurophysiology                      | 1 | Odorant vs. No-Odorant                              | Perception.Olfaction                                   | 32 |
| 30395   | 2000 | Liotti    | Biological Psychiatry                           | 3 | Anxiety > Neutral                                   | Emotion.Anxiety                                        | 13 |
| 30460   | 2000 | Taylor    | Neuropsychologia                                | 2 | Strongly Aversive - Non-Aversive                    | Emotion                                                | 4  |
| 30460   | 2000 | Taylor    | Neuropsychologia                                | 5 | Strongly Aversive - Blanks                          | Emotion                                                | 8  |
| 7090262 | 2000 | Fischer   | Behavioral Neuroscience                         | 2 | Paired Shocks (Conditioning), Decreases             | Emotion.Fear,Emotion.Anxiety,Cognition.Attention       | 12 |
| 8080168 | 2000 | Bartels   | Neuroreport                                     | 2 | Deactivations With Partner's Picture                | Emotion                                                | 19 |
| 30062   | 2001 | Savic     | Neuron                                          | 1 | EST vs. AIR, Males                                  | Perception.Olfaction                                   | 4  |
| 30299   | 2001 | Sugiura   | NeuroImage                                      | 1 | Face Detection - Control                            | Cognition.Memory.Explicit                              | 19 |
| 30299   | 2001 | Sugiura   | NeuroImage                                      | 3 | Face Detection - Face Direction                     | Cognition.Memory.Explicit                              | 8  |
| 30304   | 2001 | Bengtsson | Neuroreport                                     | 1 | VAN vs. AIR, Females, SPM99                         | Perception.Olfaction                                   | 2  |
| 8080190 | 2001 | Phelps    | Nature Neuroscience                             | 1 | Threat - Safe                                       | Emotion.Fear,Cognition.Attention                       | 4  |
| 8100249 | 2001 | Morris    | NeuroImage                                      | 2 | Unmasked CS+ vs. Unmasked CS-                       | Emotion,Cognition.Attention                            | 3  |
| 30098   | 2002 | Pessoa    | Proceedings of the National Academy of Sciences | 2 | Fearful > Happy - Valence by Attention Interaction  | Emotion.Fear                                           | 11 |
| 30121   | 2002 | Canli     | Proceedings of the National Academy of Sciences | 1 | Female Emotional Memory                             | Emotion,Cognition.Memory.Explicit                      | 9  |
| 30321   | 2002 | Jessen    | Human Brain Mapping                             | 1 | Novel - Repeated Pictures, Fixed Effects Analysis   | Cognition.Memory.Working                               | 10 |
| 30321   | 2002 | Jessen    | Human Brain Mapping                             | 2 | Novel - Repeated Pictures, Random Effects Analysis  | Cognition.Memory.Working                               | 7  |
| 30322   | 2002 | Karama    | Human Brain Mapping                             | 1 | Erotic - Neutral Film (Males)                       | Interoception.Sexuality                                | 18 |
| 30322   | 2002 | Karama    | Human Brain Mapping                             | 2 | Erotic - Neutral Film (Females)                     | Interoception.Sexuality                                | 14 |
| 4050054 | 2002 | Ortuno    | NeuroImage                                      | 1 | Main Effect of Listening                            | Perception.Audition                                    | 9  |
| 5040014 | 2002 | Bornhovd  | Brain                                           | 3 | Pain                                                | Perception.Somesthesis.Pain                            | 10 |

|         |      |                |                                                 |   |                                                                              |                                                                |    |
|---------|------|----------------|-------------------------------------------------|---|------------------------------------------------------------------------------|----------------------------------------------------------------|----|
| 7090256 | 2002 | Ochsner        | Journal of Cognitive Neuroscience               | 1 | Reappraise > Attend                                                          | Emotion,Cognition                                              | 12 |
| 6040034 | 2003 | Winston        | NeuroImage                                      | 2 | Effect of Highly Emotional Faces, Independent of SubType of Emotion          | Emotion.Disgust,Emotion.Fear,Emotion.Happiness,Emotion.Sadness | 4  |
| 6040034 | 2003 | Winston        | NeuroImage                                      | 3 | Effect of Highly Emotional Faces, Independent of SubType of Emotion and Task | Emotion.Disgust,Emotion.Fear,Emotion.Happiness,Emotion.Sadness | 3  |
| 7080206 | 2003 | Shapira        | Biological Psychiatry                           | 2 | Threat-Induced Activations, Normals                                          | Emotion.Fear                                                   | 26 |
| 7080212 | 2003 | de             | European Journal of Neuroscience                | 1 | Sucrose + Strawberry - Tasteless Solution                                    | Perception.Gustation,Perception.Olfaction                      | 11 |
| 7080212 | 2003 | de             | European Journal of Neuroscience                | 2 | Sucrose - Tasteless Solution                                                 | Perception.Gustation                                           | 8  |
| 7080212 | 2003 | de             | European Journal of Neuroscience                | 3 | Strawberry Odor - Tasteless Solution                                         | Perception.Olfaction                                           | 7  |
| 7080226 | 2003 | Rolls          | European Journal of Neuroscience                | 7 | Activations Positively Correlated with Intensity Ratings                     | Perception.Olfaction                                           | 3  |
| 8060157 | 2003 | Rangana<br>th  | Neuropsychologia                                | 1 | Regions Exhibiting a Subsequent Familiarity Effect                           | Cognition.Memory.Explicit                                      | 31 |
| 8080231 | 2003 | Piefke         | Brain                                           | 3 | (Childhood, Pos + Recent, Positive) > (Childhood, Neg + Recent, Neg)         | Cognition.Memory.Explicit,Emotion.Happiness                    | 4  |
| 8110260 | 2003 | Carr           | Proceedings of the National Academy of Sciences | 2 | Face Observation - Rest                                                      | Emotion,Action.Observation                                     | 22 |
| 9010022 | 2003 | Wicker         | Neuron                                          | 1 | Olfactory, Disgusting vs. Rest                                               | Perception.Olfaction,Emotion.Disgust                           | 12 |
| 9010022 | 2003 | Wicker         | Neuron                                          | 2 | Olfactory, Pleasant vs. Rest                                                 | Perception.Olfaction,Emotion                                   | 14 |
| 4040032 | 2004 | Lee            | Cognitive Behavioral Neurology                  | 1 | Negative vs. Neutral                                                         | Emotion                                                        | 9  |
| 5070082 | 2004 | Jackson        | NeuroImage                                      | 2 | Successful Associative Binding - Unsuccessful Associative Binding            | Cognition.Memory.Explicit,Cognition.Language                   | 10 |
| 5070099 | 2004 | Poeppe         | Neuropsychologia                                | 5 | Lexical Decision vs. FM Sweeps                                               | Cognition.Language.Semantics                                   | 23 |
| 7120357 | 2004 | Bjork          | Journal of Neuroscience                         | 5 | Gain vs. Non-Gain Outcome, Adults                                            | Emotion,Cognition                                              | 16 |
| 8100248 | 2004 | Mathews        | Journal of Cognitive Neuroscience               | 3 | Fear > Neutral, Non-Emotional                                                | Emotion.Fear                                                   | 4  |
| 8110281 | 2004 | Leibenluf<br>t | Biological Psychiatry                           | 2 | Familiar Children vs. Unfamiliar Children                                    | Perception.Vision                                              | 36 |
| 8110281 | 2004 | Leibenluf<br>t | Biological Psychiatry                           | 3 | Unfamiliar Children vs. Unfamiliar Adults                                    | Perception.Vision                                              | 14 |

|          |      |           |                                       |   |                                                                                           |                                                        |    |
|----------|------|-----------|---------------------------------------|---|-------------------------------------------------------------------------------------------|--------------------------------------------------------|----|
| 8110289  | 2004 | Najib     | American Journal of Psychiatry        | 2 | Ruminative vs. Neutral (Decreases)                                                        | Emotion                                                | 49 |
| 10080167 | 2004 | Herz      | Neuropsychologia                      | 1 | Experimental Odor vs. (Experimental Visual + Control Odor + Control Visual)               | Perception.Olfaction                                   | 5  |
| 10100218 | 2004 | Blackwood | Cognitive Brain Research              | 2 | Certainty Counting > Uncertainty Probabilistic (Balls + Survey)                           | Cognition,Cognition.Social Cognition                   | 3  |
| 6050072  | 2005 | Rounis    | NeuroImage                            | 5 | Conjunction of Main Effect of 1 Hz and 5 Hz rTMS, Decreased rCBF                          | Perception.Somesthesis                                 | 20 |
| 6080138  | 2005 | Napadow   | Human Brain Mapping                   | 2 | Manual, Decreases                                                                         | Perception.Somesthesis                                 | 11 |
| 6080138  | 2005 | Napadow   | Human Brain Mapping                   | 7 | 100-Hz Electroacupuncture, Decreases                                                      | Perception.Somesthesis                                 | 13 |
| 6110180  | 2005 | Hui       | NeuroImage                            | 1 | Deqi Only, Deactivations                                                                  | Perception.Somesthesis                                 | 87 |
| 7010001  | 2005 | Anand     | Biological Psychiatry                 | 1 | Negative vs. Neutral, Healthy Subjects, Activations                                       | Emotion                                                | 10 |
| 7020042  | 2005 | Bedwell   | International Journal of Neuroscience | 2 | Brain regions significantly active during maintenance period                              | Cognition.Memory.Working                               | 24 |
| 7090248  | 2005 | Phan      | Biological Psychiatry                 | 2 | Maintain vs. Fixation                                                                     | Emotion.Sadness,Emotion.Disgust                        | 12 |
| 7110356  | 2005 | Schienle  | Neuroscience Letters                  | 9 | Disgust > Neutral, Normals                                                                | Emotion.Disgust                                        | 2  |
| 8060140  | 2005 | Fenker    | European Journal of Neuroscience      | 5 | Remember vs. New                                                                          | Cognition.Memory.Explicit                              | 24 |
| 8060141  | 2005 | Ferretti  | NeuroImage                            | 1 | Erotic Video vs. Sport Video                                                              | Interoception.Sexuality                                | 28 |
| 8060141  | 2005 | Ferretti  | NeuroImage                            | 4 | Onset of Erection vs. No Erection                                                         | Interoception.Sexuality                                | 10 |
| 8060141  | 2005 | Ferretti  | NeuroImage                            | 5 | Sustained Erection vs. No Erection                                                        | Interoception.Sexuality                                | 8  |
| 9020029  | 2005 | Britton   | Biological Psychiatry                 | 1 | Increased CBF During General Stressful Events vs. Neutral Events, Noncombat Normals       | Cognition.Memory.Explicit,Emotion.Anxiety              | 4  |
| 60100153 | 2005 | Laurens   | Schizophrenia Research                | 1 | Novel Stimuli vs. Non-Target Stimuli, Controls                                            | Cognition.Attention                                    | 29 |
| 7030089  | 2006 | Bartolo   | Journal of Cognitive Neuroscience     | 2 | Brain Regions in which Stimuli-Related BOLD Signal was Significant for Humor Appreciation | Emotion.Happiness.Humor                                | 18 |
| 7060145  | 2006 | Finger    | NeuroImage                            | 4 | Audience > No Audience                                                                    | Cognition,Emotion                                      | 1  |
| 8040105  | 2006 | Kensinger | Journal of Neuroscience               | 4 | Pictures Corresponding with Subsequent Item-Not-Source Memory                             | Cognition.Language.Semantics,Cognition.Memory.Explicit | 8  |

|         |      |              |                                   |    |                                                                    |                                                        |    |
|---------|------|--------------|-----------------------------------|----|--------------------------------------------------------------------|--------------------------------------------------------|----|
| 8050136 | 2006 | Uncaphe r    | Neuron                            | 3  | Items Remembered > Items Forgotten (Regardless of Source Accuracy) | Cognition.Memory.Explicit                              | 4  |
| 8080205 | 2006 | Addis        | NeuroImage                        | 3  | Two Link > One Link > Zero Link                                    | Cognition.Memory.Explicit,Cognition.Language.Semantics | 15 |
| 8080217 | 2006 | Dolcos       | Journal of Neuroscience           | 1  | Emotional - Scrambled Pictures                                     | Cognition.Memory.Working,Emotion                       | 16 |
| 8080217 | 2006 | Dolcos       | Journal of Neuroscience           | 2  | Neutral - Scrambled Pictures                                       | Cognition.Memory.Working,Perception.Vision.Shape       | 16 |
| 8080217 | 2006 | Dolcos       | Journal of Neuroscience           | 3  | Emotional - Neutral Pictures                                       | Cognition.Memory.Working,Emotion                       | 8  |
| 9090091 | 2006 | Baumgar tner | Brain Research                    | 1  | Pictures with Music > Fixation                                     | Emotion,Perception.Vision,Perception.Audition          | 20 |
| 9090115 | 2006 | Harenski     | NeuroImage                        | 6  | Decrease, Non-moral > Number Discrimination                        | Action.Inhibition,Emotion                              | 10 |
| 7100278 | 2007 | Lagopoul os  | Neuroreport                       | 1  | Negative Words Associated with a Galvanic Skin Response, Normals   | Emotion,Cognition.Attention                            | 10 |
| 7110307 | 2007 | Hofer        | Brain and Cognition               | 4  | Failed Recognition, Distractor Faces > Scrambled Faces             | Cognition.Memory.Explicit                              | 5  |
| 7110325 | 2007 | Kensing er   | Neuropsychologia                  | 2  | Overall Recognition, Negative                                      | Cognition.Memory.Explicit,Emotion                      | 19 |
| 7110325 | 2007 | Kensing er   | Neuropsychologia                  | 4  | Successful Recognition, Negative                                   | Cognition.Memory.Explicit,Emotion                      | 30 |
| 7110325 | 2007 | Kensing er   | Neuropsychologia                  | 10 | Visually Specific Recognition, Negative                            | Cognition.Memory.Explicit,Emotion                      | 12 |
| 7110339 | 2007 | Abe          | Journal of Cognitive Neuroscience | 2  | Main Effect of Deceiving the Interrogator [(DT - HT) + (DL - HL)]  | Emotion,Cognition.Social Cognition                     | 7  |
| 8030076 | 2007 | Haase        | Journal of Neuroscience Methods   | 2  | Caffeine - Water                                                   | Perception.Gustation,Pharmacology.Caffeine             | 9  |
| 8030089 | 2007 | de           | Neuropsychologia                  | 3  | Hit > Miss                                                         | Cognition.Memory.Explicit                              | 13 |
| 8080169 | 2007 | Blair        | NeuroImage                        | 1  | Negative > Neutral                                                 | Cognition.Attention,Emotion                            | 6  |
| 8080169 | 2007 | Blair        | NeuroImage                        | 4  | Negative, View > Congruent > Incongruent                           | Emotion,Cognition.Attention                            | 2  |
| 8080207 | 2007 | Benuzzi      | Brain Research Bulletin           | 4  | Whole Faces vs. Parts of Faces                                     | Perception.Vision.Shape                                | 10 |
| 8080207 | 2007 | Benuzzi      | Brain Research Bulletin           | 6  | Whole Faces vs. Lower Faces                                        | Perception.Vision.Shape                                | 11 |
| 8080213 | 2007 | Chua         | Hippocampus                       | 1  | Pair Remembered > Pair Forgotten                                   | Cognition.Memory.Explicit                              | 4  |

|          |      |          |                                                   |   |                                                                             |                                                 |    |
|----------|------|----------|---------------------------------------------------|---|-----------------------------------------------------------------------------|-------------------------------------------------|----|
| 8080213  | 2007 | Chua     | Hippocampus                                       | 2 | Face Remembered/Pair Remembered > Face Remembered/Pair Forgotten            | Cognition.Memory.Explicit                       | 1  |
| 9010026  | 2007 | Sabatini | Journal of Neurophysiology                        | 4 | Unpleasant > Neutral, Study 2                                               | Emotion                                         | 9  |
| 9010027  | 2007 | Winston  | Neuropsychologia                                  | 1 | Attractiveness Judgment > Age Judgment                                      | Perception.Vision,Emotion                       | 16 |
| 7120373  | 2008 | Cooper   | NeuroImage                                        | 2 | Saliency Effect                                                             | Emotion,Cognition                               | 40 |
| 8010007  | 2008 | Guroglu  | NeuroImage                                        | 1 | Peer vs. Celebrity + Positive vs. Non-Positive                              | Cognition,Emotion                               | 18 |
| 8080223  | 2008 | Iseki    | NeuroImage                                        | 1 | Gait Observation > Scrambled Gait Observation                               | Action.Observation                              | 11 |
| 8080223  | 2008 | Iseki    | NeuroImage                                        | 4 | Virtual Walking > Scrambled Virtual Walking                                 | Action.Observation,Action.Imagination           | 11 |
| 8110309  | 2008 | Wong     | Journal of Speech, Language, and Hearing Research | 4 | Speech in Moderately Loud Noise > Speech in Loud Noise                      | Cognition.Attention,Perception.Audition         | 5  |
| 9020040  | 2008 | Herpertz | Journal of Child Psychology and Psychiatry        | 4 | Positive - Neutral Pictures, Controls                                       | Emotion                                         | 8  |
| 9090126  | 2008 | Knutson  | Biological Psychiatry                             | 7 | Gain Outcome vs. Non Gain Outcome, Healthy Controls                         | Emotion,Cognition                               | 16 |
| 10030030 | 2008 | Harenski | Social Cognitive and Affective Neuroscience       | 4 | Positive Modulation of Violation Severity Ratings, Normal Males and Females | Cognition.Social Cognition                      | 4  |
| 11010033 | 2008 | van      | Human Brain Mapping                               | 3 | Right Finger MVC vs. Right Finger Submaximum                                | Action.Execution                                | 33 |
| 9020034  | 2009 | Ewbank   | NeuroImage                                        | 7 | Unattended Fear > Unattended Neutral, (Trait Anxiety)                       | Emotion.Fear,Cognition.Attention                | 2  |
| 9020034  | 2009 | Ewbank   | NeuroImage                                        | 9 | Unattended Fear > Unattended Anger, (State Anxiety)                         | Emotion.Fear,Cognition.Attention                | 5  |
| 9090151  | 2010 | Sergerie | Schizophrenia Bulletin                            | 4 | Correlation, Happy Faces, Controls                                          | Cognition.Memory.Explicit,Emotion.Happiness     | 24 |
| 11010005 | 2010 | Davey    | Human Brain Mapping                               | 1 | Positive Feedback Faces > Control Feedback Faces                            | Emotion,Cognition.Social Cognition              | 23 |
| 11010032 | 2010 | Ziv      | Human Brain Mapping                               | 3 | Pain (Cued + Uncued) > Warm (Cued + Uncued), Harm Avoidance as Covariate    | Perception.Somesthesis.Pain,Cognition.Attention | 14 |

**S1. right amygdala**

| <b>BMapID</b> | <b>Year</b> | <b>1st Auth.</b> | <b>Journal</b>                                  | <b>#</b> | <b>Experiment Name</b>                               | <b>Behavioral Domain</b>                          | <b>#Loc</b> |
|---------------|-------------|------------------|-------------------------------------------------|----------|------------------------------------------------------|---------------------------------------------------|-------------|
| 30028         | 1999        | Hamann           | Nature Neuroscience                             | 2        | Aversive vs. Neutral Pictures                        | Emotion.Disgust                                   | 6           |
| 30031         | 2000        | Hui              | Human Brain Mapping                             | 2        | Acupuncture LI 4 vs. Tactile Stimulation, Decreases  | Perception.Somesthesis                            | 20          |
| 30043         | 2000        | Leveroni         | Journal of Neuroscience                         | 1        | Famous Faces > Newly-learned Faces                   | Cognition.Memory.Explicit                         | 28          |
| 30044         | 2003        | Maddock          | Human Brain Mapping                             | 1        | Unpleasant vs. Neutral Words                         | Emotion                                           | 28          |
| 30053         | 2001        | Poellinger       | NeuroImage                                      | 1        | Short Odorant vs. No Odorant State                   | Perception.Olfaction                              | 27          |
| 30061         | 2000        | Savic            | Neuron                                          | 1        | OS vs. AS                                            | Perception.Olfaction                              | 5           |
| 30062         | 2001        | Savic            | Neuron                                          | 2        | EST vs. AIR, Females                                 | Perception.Olfaction                              | 2           |
| 30081         | 1996        | Fox              | Nature                                          | 7        | Solo vs. Rest, Deactivations, Controls               | Cognition.Language.Speech,Action.Execution.Speech | 15          |
| 30098         | 2002        | Pessoa           | Proceedings of the National Academy of Sciences | 1        | Fearful > Neutral - Valence by Attention Interaction | Emotion.Fear                                      | 12          |
| 30138         | 2000        | Hariri           | Neuroreport                                     | 1        | Match vs. Control                                    | Emotion                                           | 4           |
| 30177         | 2000        | Sobel            | Journal of Neurophysiology                      | 1        | Odorant vs. No-Odorant                               | Perception.Olfaction                              | 32          |
| 30201         | 2000        | Etard            | Neuroreport                                     | 3        | (Naming - Rest) - (Verb - Rest)                      | Cognition.Language.Semantics                      | 5           |
| 30253         | 2001        | Brannan          | Proceedings of the National Academy of Sciences | 5        | CO2 FM - Rest, Activations                           | Interoception.Air-Hunger                          | 11          |
| 30260         | 1998        | Jernigan         | NeuroImage                                      | 2        | Fixation > Word Identification                       | Cognition.Language.Speech,Action.Execution.Speech | 11          |
| 30260         | 1998        | Jernigan         | NeuroImage                                      | 4        | Fixation > Word Recognition                          | Cognition.Memory.Explicit                         | 9           |
| 30261         | 2001        | Liotti           | Proceedings of the National Academy of Sciences | 2        | CO2FM vs. CO2MP, Deactivations                       | Interoception.Air-Hunger                          | 14          |
| 30299         | 2001        | Sugiura          | NeuroImage                                      | 1        | Face Detection - Control                             | Cognition.Memory.Explicit                         | 19          |
| 30299         | 2001        | Sugiura          | NeuroImage                                      | 2        | Face Direction - Control                             | Perception.Vision.Shape                           | 10          |
| 30304         | 2001        | Bengtsson        | Neuroreport                                     | 2        | VAN vs. AIR, Males, SPM99                            | Perception.Olfaction                              | 3           |
| 30317         | 2000        | Ingham           | Brain and Language                              | 7        | Rest - Overt Solo, Controls                          | Action.Execution.Speech,Cognition.Language.Speech | 11          |
| 30321         | 2002        | Jessen           | Human Brain Mapping                             | 1        | Novel - Repeated Pictures, Fixed Effects Analysis    | Cognition.Memory.Working                          | 10          |
| 30321         | 2002        | Jessen           | Human Brain Mapping                             | 2        | Novel - Repeated Pictures, Random Effects Analysis   | Cognition.Memory.Working                          | 7           |
| 30322         | 2002        | Karama           | Human Brain Mapping                             | 2        | Erotic - Neutral Film (Females)                      | Interoception.Sexuality                           | 14          |
| 30335         | 2003        | Ueda             | Neuroreport                                     | 3        | Expected vs. Unexpected, Unpleasant                  | Emotion                                           | 8           |

|         |      |              |                                                 |   |                                                                     |                                                                |    |
|---------|------|--------------|-------------------------------------------------|---|---------------------------------------------------------------------|----------------------------------------------------------------|----|
| 30340   | 1997 | Zald         | Proceedings of the National Academy of Sciences | 1 | Aversive Olfactory Stimulation vs. Control                          | Perception.Olfaction,Emotion                                   | 3  |
| 30373   | 1996 | Breiter      | Neuron                                          | 1 | Fearful - Neutral Faces                                             | Emotion.Fear                                                   | 8  |
| 30377   | 2000 | Damasio      | Nature Neuroscience                             | 8 | Neutral - Fear                                                      | Emotion.Fear                                                   | 7  |
| 30390   | 1997 | Lane         | American Journal of Psychiatry                  | 5 | Sadness During Film                                                 | Emotion.Sadness                                                | 16 |
| 30413   | 1997 | Reiman       | American Journal of Psychiatry                  | 1 | Film-Generated Emotion minus Film-Control                           | Emotion                                                        | 13 |
| 30413   | 1997 | Reiman       | American Journal of Psychiatry                  | 3 | Film-Generated Emotion minus Recall-Generated Emotion               | Emotion,Cognition.Memory.Explicit                              | 11 |
| 30421   | 1998 | Whalen       | Journal of Neuroscience                         | 1 | Masked Fearful vs. Masked Happy                                     | Emotion.Fear                                                   | 4  |
| 30456   | 2000 | Simpson      | Journal of Cognitive Neuroscience               | 1 | Negatively - Neutrally Valenced Pictures, Main Effect of Time       | Emotion                                                        | 47 |
| 30460   | 2000 | Taylor       | Neuropsychologia                                | 2 | Strongly Aversive - Non-Aversive                                    | Emotion                                                        | 4  |
| 30460   | 2000 | Taylor       | Neuropsychologia                                | 3 | Strongly Aversive - Mildly Aversive                                 | Emotion                                                        | 2  |
| 30460   | 2000 | Taylor       | Neuropsychologia                                | 5 | Strongly Aversive - Blanks                                          | Emotion                                                        | 8  |
| 4040032 | 2004 | Lee          | Cognitive Behavioral Neurology                  | 1 | Negative vs. Neutral                                                | Emotion                                                        | 9  |
| 5040014 | 2002 | Bornhovd     | Brain                                           | 3 | Pain                                                                | Perception.Somesthesis.Pain                                    | 10 |
| 5040052 | 2004 | Landau       | NeuroImage                                      | 8 | Encoding: Practice Effect and Load Effect                           | Cognition.Memory.Working                                       | 2  |
| 5070082 | 2004 | Jackson      | NeuroImage                                      | 2 | Successful Associative Binding - Unsuccessful Associative Binding   | Cognition.Memory.Explicit,Cognition.Language                   | 10 |
| 6040030 | 2005 | Goldin       | NeuroImage                                      | 1 | Sad > Neutral Film                                                  | Emotion.Sadness                                                | 17 |
| 6040034 | 2003 | Winston      | NeuroImage                                      | 1 | High vs. Low Intensity                                              | Emotion.Disgust,Emotion.Fear,Emotion.Happiness,Emotion.Sadness | 4  |
| 6040034 | 2003 | Winston      | NeuroImage                                      | 2 | Effect of Highly Emotional Faces, Independent of SubType of Emotion | Emotion.Disgust,Emotion.Fear,Emotion.Happiness,Emotion.Sadness | 4  |
| 6040035 | 2006 | Britton      | NeuroImage                                      | 5 | Social Positive (Joy) > Social Neutral                              | Emotion.Happiness                                              | 10 |
| 6040035 | 2006 | Britton      | NeuroImage                                      | 8 | Social > Nonsocial, Positive                                        | Emotion.Happiness                                              | 6  |
| 6050053 | 1999 | Henke        | Proceedings of the National Academy of Sciences | 1 | Associative Word Learning vs. Shallow Single Word Encoding          | Cognition.Language.Semantics                                   | 7  |
| 6050070 | 2005 | Denslow      | Biological Psychiatry                           | 2 | Volitional Movement                                                 | Action.Execution                                               | 18 |
| 6060082 | 2006 | Drobyshevsky | NeuroImage                                      | 4 | Emotional Pictures                                                  | Emotion                                                        | 18 |
| 6110183 | 2004 | Salomons     | Journal of Neuroscience                         | 1 | Controllability Manipulation (UC - C)                               | Perception.Somesthesis.Pain                                    | 22 |
| 7010001 | 2005 | Anand        | Biological Psychiatry                           | 1 | Negative vs. Neutral, Healthy Subjects, Activations                 | Emotion                                                        | 10 |



|         |      |           |                                                                           |        |                                                               |                                                        |    |
|---------|------|-----------|---------------------------------------------------------------------------|--------|---------------------------------------------------------------|--------------------------------------------------------|----|
| 7020065 | 2004 | Wang      | Journal of the American Academy of Child and Adolescent Psychiatry        | 1      | Match vs. Geometric Shapes, Controls                          | Emotion.Anger,Emotion.Fear                             | 10 |
| 7020074 | 1996 | Mummery   | Proceedings of the Royal Society of London. Series B. Biological Sciences | 3      | Natural Kinds vs. Inanimate Objects                           | Cognition.Language.Semantics,Cognition.Language.Speech | 3  |
| 7040094 | 2006 | Dapretto  | Nature Neuroscience                                                       | 1      | Imitation, Normals                                            | Emotion,Action.Execution                               | 36 |
| 7040117 | 2006 | Uher      | Behavioural Brain Research                                                | 3      | Taste: Chicken Broth                                          | Interoception.Hunger                                   | 8  |
| 7040123 | 2005 | Strangman | Neurorehabilitation and Neural Repair                                     | 4      | Verbalizable Rule Learning, Decreases                         | Action.Motor Learning,Cognition.Attention              | 16 |
| 7070194 | 2006 | Yacubian  | Journal of Neuroscience                                                   | 1<br>0 | Loss-Related Responses, Normals Group 2                       | Emotion,Cognition                                      | 2  |
| 7070194 | 2006 | Yacubian  | Journal of Neuroscience                                                   | 1<br>1 | Loss Dynamic Probabilities on a Trial-by-Trial Basis          | Emotion,Cognition                                      | 2  |
| 7080212 | 2003 | de        | European Journal of Neuroscience                                          | 1      | Sucrose + Strawberry - Tasteless Solution                     | Perception.Gustation,Perception.Olfaction              | 11 |
| 7080212 | 2003 | de        | European Journal of Neuroscience                                          | 2      | Sucrose - Tasteless Solution                                  | Perception.Gustation                                   | 8  |
| 7080212 | 2003 | de        | European Journal of Neuroscience                                          | 3      | Strawberry Odor - Tasteless Solution                          | Perception.Olfaction                                   | 7  |
| 7080231 | 2001 | Williams  | NeuroImage                                                                | 1      | Fear vs. Neutral                                              | Emotion.Fear                                           | 25 |
| 7090248 | 2005 | Phan      | Biological Psychiatry                                                     | 1      | Suppress vs. Fixation                                         | Emotion.Sadness,Emotion.Disgust                        | 13 |
| 7090253 | 1999 | Buchel    | Journal of Neuroscience                                                   | 2      | Time x Condition Interaction                                  | Cognition.Attention                                    | 4  |
| 7090259 | 1999 | Denton    | Proceedings of the National Academy of Sciences                           | 5      | Maximum Thirst, Deactivations                                 | Interoception.Thirst                                   | 3  |
| 7090262 | 2000 | Fischer   | Behavioral Neuroscience                                                   | 2      | Paired Shocks (Conditioning), Decreases                       | Emotion.Fear,Emotion.Anxiety,Cognition.Attention       | 12 |
| 7090262 | 2000 | Fischer   | Behavioral Neuroscience                                                   | 4      | Unpaired Shocks (Sensitization), Decreases                    | Emotion.Fear,Emotion.Anxiety,Cognition.Attention       | 9  |
| 7090268 | 2004 | Morris    | NeuroImage                                                                | 4      | (Repeat CS+ and Reversal CS-) > (Repeat CS- and Reversal CS+) | Cognition.Attention,Emotion                            | 6  |
| 7100287 | 2007 | Eddington | Journal of Cognitive Neuroscience                                         | 3      | Promotion Goal Priming                                        | Cognition.Language.Semantics                           | 3  |
| 7100299 | 2007 | Stark     | NeuroImage                                                                | 5      | Disgust > Neutral                                             | Emotion.Disgust                                        | 8  |
| 7110320 | 2004 | Elliott   | NeuroImage                                                                | 2      | Reward vs. No Reward                                          | Emotion,Cognition                                      | 10 |
| 7110320 | 2004 | Elliott   | NeuroImage                                                                | 3      | Reward vs. Reward and Movement                                | Emotion,Cognition                                      | 4  |
| 7110337 | 2004 | Zink      | Neuron                                                                    | 1      | Active Money > Passive Money                                  | Emotion,Cognition                                      | 15 |

|         |      |              |                                   |    |                                                                                   |                                                                |    |
|---------|------|--------------|-----------------------------------|----|-----------------------------------------------------------------------------------|----------------------------------------------------------------|----|
| 7110343 | 2007 | Cross        | Journal of Cognitive Neuroscience | 6  | Movement Time: Block Increasing (Early > Late) > Random Increasing (Early > Late) | Cognition.Memory.Working,Cognition.Attention, Action.Execution | 53 |
| 7110348 | 2004 | Grezes       | Journal of Neuroscience           | 2  | Actions Judged to Reflect Deceptive Intent                                        | Action.Observation,Cognition.Reasoning                         | 11 |
| 7120357 | 2004 | Bjork        | Journal of Neuroscience           | 3  | Loss vs. Non-Loss Anticipation, Adults                                            | Emotion,Cognition                                              | 4  |
| 7120357 | 2004 | Bjork        | Journal of Neuroscience           | 5  | Gain vs. Non-Gain Outcome, Adults                                                 | Emotion,Cognition                                              | 16 |
| 7120381 | 2006 | Adcock       | Neuron                            | 1  | MID Anticipation: Any Reward vs. +\$0                                             | Emotion,Cognition                                              | 17 |
| 7120381 | 2006 | Adcock       | Neuron                            | 2  | MID Anticipation: +\$5 vs. +\$0                                                   | Emotion,Cognition                                              | 17 |
| 8010007 | 2008 | Guroglu      | NeuroImage                        | 1  | Peer vs. Celebrity + Positive vs. Non-Positive                                    | Cognition,Emotion                                              | 18 |
| 8010008 | 2005 | Hennenlotter | NeuroImage                        | 1  | Smile Observation - Neutral Observation                                           | Emotion.Happiness,Action.Observation                           | 20 |
| 8010024 | 2006 | Eickhoff     | Human Brain Mapping               | 1  | Left Anodal, Right Cathodal Stimulation > Rest                                    | Perception.Somesthesis                                         | 3  |
| 8010031 | 2007 | Rilling      | Biological Psychiatry             | 4  | CD vs. (CD + DC + DD), Psychopathy Negative Correlation                           | Emotion,Cognition.Reasoning                                    | 1  |
| 8020044 | 2007 | Herwig       | NeuroImage                        | 1  | Expectation Unpleasant > Neutral                                                  | Emotion,Cognition.Attention                                    | 18 |
| 8020044 | 2007 | Herwig       | NeuroImage                        | 2  | Expectation Pleasant > Neutral                                                    | Emotion,Cognition.Attention                                    | 11 |
| 8020044 | 2007 | Herwig       | NeuroImage                        | 3  | Expectation Unknown > Neutral                                                     | Emotion,Cognition.Attention                                    | 14 |
| 8020057 | 2008 | Payer        | Drug and Alcohol Dependence       | 1  | Emotion Match > Shape Match, Normals                                              | Emotion.Anger,Emotion.Fear,Perception.Vision. Shape            | 13 |
| 8020058 | 2007 | Rotshtein    | Journal of Cognitive Neuroscience | 1  | Main Effect of Feature Change: Features, Change - Features, Repeat                | Perception.Vision.Shape                                        | 6  |
| 8030079 | 2007 | Mobbs        | Science                           | 3  | Yoked Control - Predator                                                          | Cognition,Emotion                                              | 4  |
| 8030079 | 2007 | Mobbs        | Science                           | 4  | Chase, Predator, High Correlated with a Distal Predator-Prey Distance             | Emotion.Fear,Emotion,Cognition                                 | 5  |
| 8030079 | 2007 | Mobbs        | Science                           | 9  | Chase, Predator, Low - Chase, Predator, High                                      | Emotion.Fear,Cognition,Emotion                                 | 5  |
| 8030082 | 2005 | Achim        | Journal of Cognitive Neuroscience | 1  | Encoding for Both Items and Associations Relative to Baseline                     | Cognition.Memory.Explicit                                      | 27 |
| 8030082 | 2005 | Achim        | Journal of Cognitive Neuroscience | 5  | Item Recognition > Associative Recognition                                        | Cognition.Memory.Explicit                                      | 10 |
| 8030082 | 2005 | Achim        | Journal of Cognitive Neuroscience | 6  | New Item Recognition > Old Item Recognition                                       | Cognition.Memory.Explicit                                      | 3  |
| 8030088 | 2003 | Wild         | Psychiatry Research               | 10 | Areas Where Activity Correlated with Reaction Time                                | Action.Execution,Emotion,Perception.Vision.Shape               | 4  |
| 8030089 | 2007 | de           | Neuropsychologia                  | 2  | Correct Rejection > Hit                                                           | Cognition.Memory.Explicit                                      | 25 |
| 8030089 | 2007 | de           | Neuropsychologia                  | 6  | Correct Rejection > Miss                                                          | Cognition.Memory.Explicit                                      | 11 |
| 8040105 | 2006 | Kensinger    | Journal of Neuroscience           | 4  | Pictures Corresponding with Subsequent Item-Not-Source Memory                     | Cognition.Language.Semantics,Cognition.Memory.Explicit         | 8  |

|         |      |           |                                                 |   |                                                             |                                                        |    |
|---------|------|-----------|-------------------------------------------------|---|-------------------------------------------------------------|--------------------------------------------------------|----|
| 8040105 | 2006 | Kensinger | Journal of Neuroscience                         | 5 | Words Corresponding with Subsequent Item-Not-Source Memory  | Cognition.Language.Semantics,Cognition.Memory.Explicit | 8  |
| 8040105 | 2006 | Kensinger | Journal of Neuroscience                         | 6 | All Items Corresponding with Item-Not-Source Memory         | Cognition.Language.Semantics,Cognition.Memory.Explicit | 18 |
| 8050114 | 2006 | Blair     | Journal of Neuroscience                         | 1 | Moderated by Decision Form: RewRew > PunPun                 | Cognition,Emotion                                      | 6  |
| 8050114 | 2006 | Blair     | Journal of Neuroscience                         | 2 | Moderated by Decision Form: RewRew> RewPun                  | Cognition,Emotion                                      | 6  |
| 8050114 | 2006 | Blair     | Journal of Neuroscience                         | 3 | Moderated by Decision Form: RewPun > PunPun                 | Cognition,Emotion                                      | 5  |
| 8050115 | 2001 | Blood     | Proceedings of the National Academy of Sciences | 2 | Negative Correlations with Ratings of Chills Intensity      | Perception.Audition,Emotion                            | 7  |
| 8050115 | 2001 | Blood     | Proceedings of the National Academy of Sciences | 4 | Subject-Selected Music - Control Music, Deactivations       | Perception.Audition,Emotion                            | 7  |
| 8050115 | 2001 | Blood     | Proceedings of the National Academy of Sciences | 6 | Negative Correlations with Ratings of Pleasantness          | Perception.Audition,Emotion                            | 6  |
| 8050115 | 2001 | Blood     | Proceedings of the National Academy of Sciences | 8 | Negative Correlations with Ratings of Emotional Intensity   | Perception.Audition,Emotion                            | 7  |
| 8050122 | 2006 | Daselaar  | Journal of Neurophysiology                      | 3 | Brain Regions Associated with Novelty                       | Cognition.Memory.Explicit                              | 14 |
| 8050124 | 2003 | Elliott   | Journal of Neuroscience                         | 1 | All-or-Nothing Response to Reward                           | Emotion,Cognition                                      | 12 |
| 8050128 | 1999 | Francis   | Neuroreport                                     | 2 | Pleasant Taste                                              | Perception.Gustation                                   | 8  |
| 8050128 | 1999 | Francis   | Neuroreport                                     | 3 | Pleasant Smell                                              | Perception.Olfaction                                   | 7  |
| 8060141 | 2005 | Ferretti  | NeuroImage                                      | 1 | Erotic Video vs. Sport Video                                | Interoception.Sexuality                                | 28 |
| 8060141 | 2005 | Ferretti  | NeuroImage                                      | 2 | Regression Analysis with Penile Turgidity                   | Interoception.Sexuality                                | 28 |
| 8060141 | 2005 | Ferretti  | NeuroImage                                      | 3 | Erotic Pictures vs. Sport Pictures                          | Interoception.Sexuality                                | 18 |
| 8060141 | 2005 | Ferretti  | NeuroImage                                      | 4 | Onset of Erection vs. No Erection                           | Interoception.Sexuality                                | 10 |
| 8060141 | 2005 | Ferretti  | NeuroImage                                      | 5 | Sustained Erection vs. No Erection                          | Interoception.Sexuality                                | 8  |
| 8060145 | 1999 | Henson    | Journal of Neuroscience                         | 2 | New > Remember Responses, (Retrieval + Encoding)            | Cognition.Memory.Explicit                              | 12 |
| 8060147 | 2007 | Marsh     | NeuroImage                                      | 2 | Activation Associated with Reward Value                     | Cognition,Emotion                                      | 11 |
| 8060160 | 2008 | Suchan    | Hippocampus                                     | 2 | Familiarity vs. Correct Rejection                           | Cognition.Memory.Explicit                              | 2  |
| 8060163 | 2004 | Weis      | Neuroreport                                     | 1 | Hit, Correct Source Judgment vs. Hit, Wrong Source Judgment | Cognition.Memory.Explicit                              | 2  |
| 8080167 | 2004 | Bartels   | NeuroImage                                      | 2 | Deactivations With Maternal Love                            | Emotion                                                | 27 |
| 8080169 | 2007 | Blair     | NeuroImage                                      | 4 | Negative, View > Congruent > Incongruent                    | Emotion,Cognition.Attention                            | 2  |

|         |      |           |                                                 |   |                                                           |                                                     |    |
|---------|------|-----------|-------------------------------------------------|---|-----------------------------------------------------------|-----------------------------------------------------|----|
| 8080175 | 2005 | Dresel    | NeuroImage                                      | 1 | Whistling vs. Voluntary Breathing                         | Action.Execution                                    | 30 |
| 8080182 | 2008 | Goldin    | Biological Psychiatry                           | 1 | Watch, Negative > Watch, Neutral                          | Emotion.Disgust                                     | 26 |
| 8080184 | 2008 | Huh       | Journal of Sexual Medicine                      | 1 | Perfume > Rest                                            | Perception.Olfaction,Interoception.Sexuality        | 22 |
| 8080199 | 2006 | Grimm     | NeuroImage                                      | 3 | exPV > exPJ                                               | Perception.Vision                                   | 11 |
| 8080207 | 2007 | Benuzzi   | Brain Research Bulletin                         | 4 | Whole Faces vs. Parts of Faces                            | Perception.Vision.Shape                             | 10 |
| 8080207 | 2007 | Benuzzi   | Brain Research Bulletin                         | 6 | Whole Faces vs. Lower Faces                               | Perception.Vision.Shape                             | 11 |
| 8080208 | 2006 | Britton   | NeuroImage                                      | 2 | IAPS - Fixation                                           | Emotion,Perception.Vision.Shape                     | 5  |
| 8080208 | 2006 | Britton   | NeuroImage                                      | 9 | Faces, Anger - Neutral                                    | Emotion.Anger                                       | 6  |
| 8080210 | 1998 | Buchel    | Neuron                                          | 1 | CS+ Unpaired vs. CS-                                      | Cognition.Attention,Emotion                         | 12 |
| 8080213 | 2007 | Chua      | Hippocampus                                     | 1 | Pair Remembered > Pair Forgotten                          | Cognition.Memory.Explicit                           | 4  |
| 8080214 | 2002 | Critchley | Neuron                                          | 2 | Conjunction of Unmasked and Masked Conditioning           | Cognition.Attention,Emotion,Perception.Vision.Shape | 1  |
| 8080215 | 2005 | Dalton    | Journal of Cognitive Neuroscience               | 2 | Threat - Safety, Correlated with Self-Reported Anxiety    | Emotion,Cognition.Attention                         | 6  |
| 8080217 | 2006 | Dolcos    | Journal of Neuroscience                         | 1 | Emotional - Scrambled Pictures                            | Cognition.Memory.Working,Emotion                    | 16 |
| 8080217 | 2006 | Dolcos    | Journal of Neuroscience                         | 2 | Neutral - Scrambled Pictures                              | Cognition.Memory.Working,Perception.Vision.Shape    | 16 |
| 8080217 | 2006 | Dolcos    | Journal of Neuroscience                         | 3 | Emotional - Neutral Pictures                              | Cognition.Memory.Working,Emotion                    | 8  |
| 8080233 | 2007 | Qin       | NeuroImage                                      | 2 | Formation of New Memories Including Associations vs. Miss | Cognition.Memory.Explicit                           | 20 |
| 8100248 | 2004 | Mathews   | Journal of Cognitive Neuroscience               | 1 | Fear > Neutral, View                                      | Emotion.Fear                                        | 22 |
| 8100253 | 2003 | Wrase     | Neuroscience Letters                            | 1 | Positive vs. Neutral, Men                                 | Emotion                                             | 6  |
| 8110256 | 2006 | Berpohl   | Human Brain Mapping                             | 2 | Emotional vs. Neutral                                     | Emotion,Cognition.Attention                         | 17 |
| 8110256 | 2006 | Berpohl   | Human Brain Mapping                             | 3 | Expected Positive vs. Expected Neutral                    | Emotion                                             | 4  |
| 8110256 | 2006 | Berpohl   | Human Brain Mapping                             | 5 | Expected Emotional vs. Unexpected Emotional               | Emotion,Cognition.Attention                         | 17 |
| 8110260 | 2003 | Carr      | Proceedings of the National Academy of Sciences | 1 | Face Imitation - Rest                                     | Emotion,Action.Execution                            | 32 |
| 8110260 | 2003 | Carr      | Proceedings of the National Academy of Sciences | 2 | Face Observation - Rest                                   | Emotion,Action.Observation                          | 22 |
| 8110260 | 2003 | Carr      | Proceedings of the National Academy of Sciences | 3 | Imitation - Observation                                   | Emotion,Action.Execution                            | 27 |
| 8110270 | 2006 | Holt      | Schizophrenia Research                          | 7 | Neutral vs. Fixation, Normals                             | Perception.Vision.Shape                             | 6  |
| 8110270 | 2006 | Holt      | Schizophrenia Research                          | 1 | First Block Analysis, Happy vs. Fixation,                 | Emotion.Happiness                                   | 2  |

|         |      |             |                                            |        |                                                                                      |                                               |    |
|---------|------|-------------|--------------------------------------------|--------|--------------------------------------------------------------------------------------|-----------------------------------------------|----|
|         |      |             |                                            | 2      | Normals                                                                              |                                               |    |
| 8110279 | 2005 | Kulkami     | European Journal of Neuroscience           | 1      | Interaction Between Pain and Unpleasantness                                          | Perception.Somesthesis.Pain,Emotion           | 9  |
| 8110298 | 2004 | Ruby        | Journal of Cognitive Neuroscience          | 3      | Emotional (PE1+PE3) vs. Neutral (PN1+PN3) Irrespective of Perspective                | Cognition.Social Cognition                    | 7  |
| 8110304 | 2005 | Stark       | Biological Psychology                      | 1      | Disgust > Neutral, NonSM                                                             | Emotion.Disgust                               | 2  |
| 8110304 | 2005 | Stark       | Biological Psychology                      | 3      | Erotic > Neutral, NonSM                                                              | Interoception.Sexuality                       | 7  |
| 9010001 | 2008 | Altshuler   | Bipolar Disorders                          | 2      | Match Faces vs. Forms, Normals                                                       | Emotion.Anger,Emotion.Fear                    | 7  |
| 9010009 | 2007 | Lamm        | Journal of Cognitive Neuroscience          | 1      | Observation of Patients Expressing Pain and the First-Hand Experience of Pain        | Emotion,Perception.Somesthesis.Pain,Cognition | 17 |
| 9010014 | 2007 | Martin      | Experimental Brain Research                | 3      | Shifted Water Swallow vs. Rest                                                       | Action.Execution                              | 32 |
| 9010020 | 2008 | Vanderwal   | NeuroImage                                 | 4      | Friends vs. Bumper Cars                                                              | Emotion,Cognition.Social Cognition            | 15 |
| 9010022 | 2003 | Wicker      | Neuron                                     | 2      | Olfactory, Pleasant vs. Rest                                                         | Perception.Olfaction,Emotion                  | 14 |
| 9010026 | 2007 | Sabatinelli | Journal of Neurophysiology                 | 1      | Pleasant > Neutral, Study 1                                                          | Emotion,Interoception.Sexuality               | 19 |
| 9010026 | 2007 | Sabatinelli | Journal of Neurophysiology                 | 2      | Unpleasant > Neutral, Study 1                                                        | Emotion                                       | 14 |
| 9010027 | 2007 | Winston     | Neuropsychologia                           | 4      | High Attractiveness + Low Attractiveness > Medium Attractiveness                     | Perception.Vision,Emotion                     | 3  |
| 9020034 | 2009 | Ewbank      | NeuroImage                                 | 1      | Attended Anger > Attended Neutral, (Trait Anxiety)                                   | Emotion.Anger,Cognition.Attention             | 5  |
| 9020034 | 2009 | Ewbank      | NeuroImage                                 | 2      | Attended Anger > Attended Neutral, (State Anxiety)                                   | Emotion.Anger,Cognition.Attention             | 1  |
| 9020040 | 2008 | Herpertz    | Journal of Child Psychology and Psychiatry | 2      | Negative - Neutral Pictures, Controls                                                | Emotion                                       | 21 |
| 9020041 | 2007 | Jabbi       | NeuroImage                                 | 6      | Correlation, Fantasy + Pleasant Faces                                                | Emotion,Cognition                             | 23 |
| 9020041 | 2007 | Jabbi       | NeuroImage                                 | 1<br>1 | Correlation, Perspective Taking + Neutral Faces                                      | Emotion,Cognition                             | 15 |
| 9030057 | 2005 | Lanius      | Biological Psychiatry                      | 1      | Recall, Traumatic > Rest, Normals                                                    | Cognition.Memory.Explicit,Emotion             | 24 |
| 9090091 | 2006 | Baumgartner | Brain Research                             | 4      | Pictures With Music > Pictures Without Music                                         | Emotion,Perception.Audition                   | 27 |
| 9090103 | 2009 | Camara      | Frontiers in Human Neuroscience            | 1<br>0 | Gain-related Interregional Interactions with the Ventral Striatum in Standard Trials | Emotion,Cognition                             | 7  |
| 9090115 | 2006 | Harenski    | NeuroImage                                 | 2      | Watch, Non-moral > Number Discrimination                                             | Emotion                                       | 5  |
| 9090132 | 2008 | LoPresti    | Journal of Neuroscience                    | 2      | Face Processing Analysis, DMS vs. Number Discrimination, Stimuli                     | Cognition.Memory.Working,Emotion              | 25 |
| 9090134 | 1996 | Maquet      | Nature                                     | 1      | Activations During REM Sleep                                                         | Action.Rest                                   | 7  |

|              |      |                  |                                                 |        |                                                                                             |                                                           |    |
|--------------|------|------------------|-------------------------------------------------|--------|---------------------------------------------------------------------------------------------|-----------------------------------------------------------|----|
| 1003003<br>6 | 2006 | Johnson          | Neurobiology of Aging                           | 1      | Activations in Novel Drawings Relative to Previously Learned, Normals                       | Cognition.Memory.Explicit                                 | 6  |
| 1003003<br>9 | 2009 | Kato             | Behavioral Neuroscience                         | 4      | Positive Political Advertisements, Changed > Unchanged                                      | Cognition,Emotion                                         | 21 |
| 1003009<br>5 | 2008 | Plassmann        | Proceedings of the National Academy of Sciences | 5      | Wine 2 High vs. Low Price, Sampling                                                         | Perception.Gustation                                      | 12 |
| 1006012<br>2 | 2010 | Mobascher        | NeuroImage                                      | 1      | Activation in Response to Laser Stimulation                                                 | Perception.Somesthesis.Pain                               | 17 |
| 1007012<br>8 | 2009 | Cooper           | Social Cognitive and Affective Neuroscience     | 4      | CERT/UNC, UNC High Gain > CERT/UNC, UNC Low Gain                                            | Cognition,Emotion                                         | 42 |
| 1007012<br>9 | 2005 | Coricelli        | Nature Neuroscience                             | 9      | Activity Preceding Choice of Maximal Expected Values in the Complete Choose Condition       | Cognition,Emotion                                         | 6  |
| 1008016<br>9 | 2008 | Hooker           | Neuropsychologia                                | 2      | Negative Object Recognition > Neutral Object Recognition                                    | Emotion,Cognition.Memory.Explicit                         | 9  |
| 1008016<br>9 | 2008 | Hooker           | Neuropsychologia                                | 1<br>5 | Happy Learning > Neutral Learning, Negative Correlation with Extraversion                   | Cognition,Emotion.Happiness                               | 11 |
| 1101000<br>5 | 2010 | Davey            | Human Brain Mapping                             | 1      | Positive Feedback Faces > Control Feedback Faces                                            | Emotion,Cognition.Social Cognition                        | 23 |
| 1101001<br>2 | 2010 | Linke            | NeuroImage                                      | 1      | Correct Responses - Incorrect Responses                                                     | Cognition,Emotion,Cognition.Attention                     | 16 |
| 1101001<br>2 | 2010 | Linke            | NeuroImage                                      | 4      | Positve Correlation with Extrinsic Motivation                                               | Cognition,Emotion,Cognition.Attention                     | 15 |
| 1101002<br>7 | 2010 | Simoese-Franklin | Human Brain Mapping                             | 3      | Nuetral Go-NoGo vs. Punishment Go-NoGo, Successful Inhibitions                              | Cognition.Attention,Action.Inhibition,Cognition, Emotion  | 17 |
| 1103003<br>4 | 2008 | Cohen            | NeuroImage                                      | 1      | Reward > Loss ( $p < .001$ )                                                                | Cognition,Emotion,Cognition.Attention,Cognition.Reasoning | 47 |
| 1103003<br>4 | 2008 | Cohen            | NeuroImage                                      | 2      | Reward > Loss (FWE $p < .05$ )                                                              | Cognition,Emotion,Cognition.Attention,Cognition.Reasoning | 4  |
| 1103003<br>9 | 2008 | Xue              | Journal of Neuroscience                         | 3      | Outcome Reversal Learning - No-Reversal Learning                                            | Cognition.Memory.Explicit,Cognition.Attention             | 28 |
| 1103004<br>3 | 2006 | Beaver           | Journal of Neuroscience                         | 5      | Disgusting - Appetizing                                                                     | Perception.Gustation                                      | 3  |
| 1103004<br>5 | 2008 | Fuhrer           | Obesity                                         | 5      | Increased Interaction between the State of Satiation and the Quaility of Visual Stimulation | Perception.Gustation                                      | 5  |
| 1103004<br>6 | 2010 | Mobascher        | International Journal of Psychophysiology       | 1      | Pain > Rest                                                                                 | Perception.Somesthesis.Pain                               | 17 |
| 1104005<br>4 | 2010 | Smeets           | NeuroImage                                      | 2      | Main Effect of Energy Content (Taste Activation by Caloric vs. Non-Caloric Orangeade)       | Perception.Gustation                                      | 2  |

|              |      |        |                     |   |                            |                  |    |
|--------------|------|--------|---------------------|---|----------------------------|------------------|----|
| 6010017<br>5 | 1998 | Mattay | Psychiatry Research | 3 | Dominant Hand Random Motor | Action.Execution | 15 |
|--------------|------|--------|---------------------|---|----------------------------|------------------|----|

| <b>S1. OFC</b> |             |                  |                               |          |                                                                |                                                                    |             |
|----------------|-------------|------------------|-------------------------------|----------|----------------------------------------------------------------|--------------------------------------------------------------------|-------------|
| <b>BMapID</b>  | <b>Year</b> | <b>1st Auth.</b> | <b>Journal</b>                | <b>#</b> | <b>Experiment Name</b>                                         | <b>Behavioral Domain</b>                                           | <b>#Loc</b> |
| 4020007        | 1994        | Grasby           | Brain                         | 2        | Negative Correlations of Word List Length                      | Cognition.Memory.Working                                           | 15          |
| 5070118        | 1994        | Anderson         | Brain                         | 4        | Remembered Saccades vs. Fixation, Decreases                    | Perception.Vision.Motion,Cognition.Memory.Working,Action.Execution | 6           |
| 30405          | 1995        | Partiot          | Neuroreport                   | 2        | Emotional Script - Control                                     | Cognition.Time,Emotion,Action.Preparation                          | 10          |
| 7070175        | 1995        | Ghatan           | NeuroImage                    | 2        | Perceptual Maze vs. Rest, Decrease in rCBF                     | Cognition.Reasoning,Action.Execution                               | 27          |
| 7070175        | 1995        | Ghatan           | NeuroImage                    | 6        | Perceptual Maze vs. Motor Control, Decrease in rCBF            | Cognition.Reasoning,Action.Execution                               | 22          |
| 8080206        | 1995        | Andreasen        | American Journal ofPsychiatry | 4        | Rest > Word Generation                                         | Action.Execution.Speech,Cognition.Language.Speech                  | 7           |
| 8080206        | 1995        | Andreasen        | American Journal ofPsychiatry | 5        | Episodic Memory > Word Generation                              | Cognition.Memory.Explicit                                          | 7           |
| 30385          | 1996        | George           | Biological Psychiatry         | 2        | Happy - Neutral in Women                                       | Emotion.Happiness                                                  | 4           |
| 4020015        | 1996        | Schumacher       | NeuroImage                    | 2        | Visual Memory - Control, Decreases                             | Cognition.Memory.Working                                           | 5           |
| 4020015        | 1996        | Schumacher       | NeuroImage                    | 4        | Auditory Memory - Control, Decreases                           | Cognition.Memory.Working                                           | 10          |
| 5090242        | 1996        | Sweeney          | Journal ofNeurophysiology     | 6        | Memory Guided Saccades - Visually Guided Saccades, Decreases   | Perception.Vision.Motion,Action.Execution,Cognition.Memory.Working | 2           |
| 6060079        | 1996        | Buckner          | Journal ofNeuroscience        | 2        | Recall - Repetition, Best Estimate, Decreases, Strict Criteria | Cognition.Memory.Explicit                                          | 9           |
| 6060079        | 1996        | Buckner          | Journal ofNeuroscience        | 4        | Recall - Rest, Best Estimate, Decreases, Strict Criteria       | Cognition.Memory.Explicit                                          | 18          |
| 7020066        | 1996        | Warburton        | Brain                         | 11       | Noun Generation vs. Verb Generation, Group 3 Normals           | Cognition.Language.Semantics,Cognition.Language.Speech             | 4           |
| 9090134        | 1996        | Maquet           | Nature                        | 2        | DeactivationsDuring REM Sleep                                  | Action.Rest                                                        | 24          |
| 60100173       | 1996        | Larsson          | Neuroreport                   | 1        | SelfPaced Movement - Reference                                 | Action.Execution                                                   | 12          |
| 30265          | 1997        | Rumsey           | Brain                         | 5        | Fixation - IrregularPronunciation                              | Cognition.Language.Speech,Action.Execution.Speech                  | 24          |
| 30265          | 1997        | Rumsey           | Brain                         | 6        | Fixation -                                                     | Cognition.Language.Speech,Action.Execution.Speech                  | 21          |



|         |      |            |                                     |    |                                          |                                                          |    |
|---------|------|------------|-------------------------------------|----|------------------------------------------|----------------------------------------------------------|----|
|         |      |            |                                     |    | PseudowordPronunciation                  |                                                          |    |
| 30265   | 1997 | Rumsey     | Brain                               | 12 | Fixation - Orthographic                  | Cognition.Language.Semantics                             | 20 |
| 30367   | 1997 | Beauregard | Journal ofCognitiveNeuroscienc<br>e | 1  | Random Letters - Baseline                | Cognition.Language.Orthography                           | 18 |
| 30367   | 1997 | Beauregard | Journal ofCognitiveNeuroscienc<br>e | 7  | Emotional Words - Baseline               | Emotion,Cognition.Language.Orthography                   | 22 |
| 30367   | 1997 | Beauregard | Journal ofCognitiveNeuroscienc<br>e | 10 | Random-Letter Instructions - Baseline    | Cognition.Attention,Action.Preparation                   | 3  |
| 30367   | 1997 | Beauregard | Journal ofCognitiveNeuroscienc<br>e | 12 | Word Instructions - Baseline             | Cognition.Attention,Action.Preparation                   | 3  |
| 30444   | 1997 | Jonides    | Journal ofCognitiveNeuroscienc<br>e | 2  | 3-back minus Control, Deactivations      | Cognition.Memory.Working                                 | 18 |
| 30444   | 1997 | Jonides    | Journal ofCognitiveNeuroscienc<br>e | 4  | 2-back minus Control, Deactivations      | Cognition.Memory.Working                                 | 11 |
| 5040049 | 1997 | Derbyshire | Pain                                | 2  | Pain vs. Warm, Deactivations             | Perception.Somesthesia.Pain                              | 9  |
| 5120251 | 1997 | Doricchi   | Experimental Brain Research         | 4  | Fixation vs. Antisaccades                | Perception.Vision.Motion,Action.Inhibition               | 10 |
| 30120   | 1998 | Canli      | Neuroreport                         | 2  | Negative vs. Positive-Arousal Equal      | Emotion.Sadness,Emotion.Anger                            | 5  |
| 30185   | 1998 | Wagner     | Neuroreport                         | 3  | Retrieval Words >Textures                | Cognition.Memory.Explicit,Cognition.Language.Orthography | 13 |
| 30260   | 1998 | Jernigan   | NeuroImage                          | 2  | Fixation > Word Identification           | Cognition.Language.Speech,Action.Execution.Speech        | 11 |
| 30260   | 1998 | Jernigan   | NeuroImage                          | 4  | Fixation > Word Recognition              | Cognition.Memory.Explicit                                | 9  |
| 7010029 | 1998 | Stevens    | Archives of General Psychiatry      | 3  | TSPT vs. Baseline, Normals               | Perception.Audition,Cognition.Memory.Working             | 22 |
| 30164   | 1999 | Poldrack   | NeuroImage                          | 8  | Case >Pseudoword Phonological            | Cognition.Language.Orthography                           | 8  |
| 30200   | 1999 | Shen       | Human Brain Mapping                 | 3  | Spatial Recognition > Visual Recognition | Perception.Vision.Shape                                  | 12 |
| 30200   | 1999 | Shen       | Human Brain Mapping                 | 4  | Common Deactivation                      | Cognition.Memory.Working,Perception.Vision.Shape         | 8  |

|          |      |           |                                                 |    |                                                           |                                                                                 |    |
|----------|------|-----------|-------------------------------------------------|----|-----------------------------------------------------------|---------------------------------------------------------------------------------|----|
| 5040019  | 1999 | Murtha    | Journal of Cognitive Neuroscience               | 6  | Picture Naming - Baseline (Deactivations)                 | Cognition.Language.Semantics,Cognition.Language.Speech, Action.Execution.Speech | 15 |
| 5040019  | 1999 | Murtha    | Journal of Cognitive Neuroscience               | 10 | Semantic Judgment - Baseline (Deactivations)              | Cognition.Language.Semantics                                                    | 16 |
| 5040019  | 1999 | Murtha    | Journal of Cognitive Neuroscience               | 20 | Picture Anticipation - Baseline (Deactivations)           | Action.Preparation                                                              | 4  |
| 5040019  | 1999 | Murtha    | Journal of Cognitive Neuroscience               | 22 | Semantic Judgment Anticipation - Baseline (Deactivations) | Action.Preparation                                                              | 2  |
| 7090259  | 1999 | Denton    | Proceedings of the National Academy of Sciences | 2  | Wet Mouth, Activations                                    | Interoception.Thirst                                                            | 9  |
| 7090259  | 1999 | Denton    | Proceedings of the National Academy of Sciences | 3  | 3 Min After Satiation, Activations                        | Interoception.Thirst                                                            | 6  |
| 8050128  | 1999 | Francis   | Neuroreport                                     | 1  | Pleasant Touch                                            | Perception.Somesthesis                                                          | 7  |
| 8050128  | 1999 | Francis   | Neuroreport                                     | 2  | Pleasant Taste                                            | Perception.Gustation                                                            | 8  |
| 8110305  | 1999 | Stoleru   | Archives of Sexual Behavior                     | 4  | Negative Interaction, Testosterone x Condition            | Interoception.Sexuality                                                         | 4  |
| 10100228 | 1999 | Rogers    | Journal of Neuroscience                         | 4  | Control - (4:2)                                           | Cognition,Emotion                                                               | 4  |
| 10100228 | 1999 | Rogers    | Journal of Neuroscience                         | 7  | (4:2 - 5:1)                                               | Cognition,Emotion                                                               | 3  |
| 30001    | 2000 | Anderson  | Journal of Cognitive Neuroscience               | 4  | FA, Retrieval > Encoding in Young                         | Cognition.Memory.Explicit                                                       | 19 |
| 30001    | 2000 | Anderson  | Journal of Cognitive Neuroscience               | 6  | FA > DA (Encoding) in Young                               | Cognition.Attention                                                             | 18 |
| 30002    | 2000 | Arrington | Journal of Cognitive Neuroscience               | 1  | Object- > Location-based Cueing                           | Cognition.Attention                                                             | 15 |
| 30043    | 2000 | Leveroni  | Journal of Neuroscience                         | 1  | Famous Faces > Newly-learned Faces                        | Cognition.Memory.Explicit                                                       | 28 |
| 30177    | 2000 | Sobel     | Journal of Neurophysiology                      | 1  | Odorant vs. No-Odorant                                    | Perception.Olfaction                                                            | 32 |
| 30327    | 2000 | Leung     | Cerebral Cortex                                 | 4  | Inverse Stroop Negative                                   | Cognition.Attention                                                             | 6  |

|         |      |          |                                                 |   |                                                                   |                                                  |    |
|---------|------|----------|-------------------------------------------------|---|-------------------------------------------------------------------|--------------------------------------------------|----|
| 30377   | 2000 | Damasio  | Nature Neuroscience                             | 1 | Sadness - Neutral                                                 | Emotion.Sadness                                  | 16 |
| 30377   | 2000 | Damasio  | Nature Neuroscience                             | 2 | Happiness - Neutral                                               | Emotion.Happiness                                | 14 |
| 30377   | 2000 | Damasio  | Nature Neuroscience                             | 8 | Neutral - Fear                                                    | Emotion.Fear                                     | 7  |
| 30394   | 2000 | Liberzon | Neuropsychopharmacology                         | 2 | Rating Phase Decreases                                            | Emotion                                          | 4  |
| 30409   | 2000 | Pietrini | American Journal of Psychiatry                  | 1 | Unrestrained Aggression - Emotionally Neutral Behavior, Decreases | Emotion                                          | 3  |
| 30409   | 2000 | Pietrini | American Journal of Psychiatry                  | 2 | Unrestrained Aggression - Emotionally Neutral Behavior, Increases | Emotion                                          | 4  |
| 30409   | 2000 | Pietrini | American Journal of Psychiatry                  | 3 | Physical Restraint - Emotionally Neutral Behavior, Decreases      | Emotion                                          | 3  |
| 7090262 | 2000 | Fischer  | Behavioral Neuroscience                         | 2 | Paired Shocks (Conditioning), Decreases                           | Emotion.Fear,Emotion.Anxiety,Cognition.Attention | 12 |
| 7090262 | 2000 | Fischer  | Behavioral Neuroscience                         | 4 | Unpaired Shocks (Sensitization), Decreases                        | Emotion.Fear,Emotion.Anxiety,Cognition.Attention | 9  |
| 30066   | 2001 | Sperling | Human Brain Mapping                             | 3 | Novel vs. Repeated                                                | Cognition.Memory.Working                         | 17 |
| 30135   | 2001 | Grady    | NeuroImage                                      | 2 | Word Recognition - Word Control                                   | Cognition.Memory.Explicit                        | 19 |
| 30167   | 2001 | Roskies  | Journal of Cognitive Neuroscience               | 1 | Synonym - Rhyme                                                   | Cognition.Language.Semantics                     | 22 |
| 30213   | 2001 | Tan      | NeuroImage                                      | 1 | Semantic Relatedness Judgment vs. Crosshair Fixation              | Cognition.Language.Semantics                     | 36 |
| 30261   | 2001 | Liotti   | Proceedings of the National Academy of Sciences | 2 | CO2FM vs. CO2MP, Deactivations                                    | Interoception.Air-Hunger                         | 14 |
| 30266   | 2001 | Shaywitz | NeuroImage                                      | 2 | Select - Simple, Deactivations                                    | Cognition.Attention                              | 14 |
| 30266   | 2001 | Shaywitz | NeuroImage                                      | 6 | Complex Divide - Select, Deactivations                            | Cognition.Attention                              | 13 |
| 7080227 | 2001 | Savage   | Brain                                           | 5 | Spontaneous (Covariate Analyses with Clustering)                  | Cognition.Memory.Working                         | 3  |
| 7120376 | 2001 | Knutson  | Neuroreport                                     | 3 | Outcome: \$1.00 Reward vs. \$50.00 Reward                         | Emotion,Cognition                                | 6  |
| 7120376 | 2001 | Knutson  | Neuroreport                                     | 4 | Outcome: All Reward vs. No                                        | Emotion,Cognition                                | 4  |

|          |      |                    |                                   |    |                                                                                          |                                                        |    |
|----------|------|--------------------|-----------------------------------|----|------------------------------------------------------------------------------------------|--------------------------------------------------------|----|
|          |      |                    |                                   |    | Reward                                                                                   |                                                        |    |
| 8110306  | 2001 | Suzuki             | Journal of Gerontology            | 1  | Odorized Air vs. Odorless Air, Young Adults                                              | Perception.Olfaction                                   | 15 |
| 10070131 | 2001 | O'Doherty          | Nature Neuroscience               | 1  | High Probability Reward - High Probability Punishment Reversal                           | Cognition,Emotion                                      | 3  |
| 10080151 | 2001 | Damasio            | NeuroImage                        | 17 | Concrete Entities - Picture Control, Spatial Relations, Deactivations, Post Hoc Analysis | Cognition.Language.Semantics,Cognition.Language.Speech | 9  |
| 10080151 | 2001 | Damasio            | NeuroImage                        | 19 | Abstract Drawings - Picture Control, Spatial Relations, Deactivations, Post Hoc Analysis | Cognition.Language.Semantics,Cognition.Language.Speech | 7  |
| 30203    | 2002 | Luke               | Human Brain Mapping               | 1  | Chinese Syntax - Chinese Font                                                            | Cognition.Language.Syntax                              | 17 |
| 30285    | 2002 | O'Leary            | Neuropsychopharmacology           | 4  | Baseline > Dichotic Listening, Pre-Smoking                                               | Cognition.Attention,Cognition.Language.Phonology       | 3  |
| 30338    | 2002 | Wright             | Neuroreport                       | 1  | Emotional vs. Neutral                                                                    | Emotion                                                | 6  |
| 30359    | 2002 | Nathaniel-James    | NeuroImage                        | 2  | Initiation > Suppression                                                                 | Cognition.Language.Semantics,Cognition.Language.Speech | 3  |
| 7090256  | 2002 | Ochsner            | Journal of Cognitive Neuroscience | 3  | Attend>Reappraise                                                                        | Emotion,Cognition                                      | 5  |
| 9010006  | 2002 | Fraser             | Neuron                            | 1  | Water Swallowing - Water Non-Swallowing, Pre-Stimulation                                 | Action.Execution                                       | 8  |
| 9010006  | 2002 | Fraser             | Neuron                            | 2  | Water Swallowing - Water Non-Swallowing, Post-Stimulation                                | Action.Execution                                       | 8  |
| 30301    | 2003 | Abel               | Human Brain Mapping               | 1  | Neutral Faces vs. Fixation, Placebo                                                      | Cognition                                              | 23 |
| 4040037  | 2003 | Mitterschiffthaler | Neuroreport                       | 1  | Positive vs. Neutral Pictures, Normals                                                   | Emotion                                                | 9  |
| 5070126  | 2003 | Binder             | Journal of Cognitive Neuroscience | 1  | Word >Nonword                                                                            | Cognition.Language.Semantics                           | 26 |
| 5070126  | 2003 | Binder             | Journal                           | 3  | Lo > Hi                                                                                  | Cognition.Language.Orthography                         | 26 |

|         |      |            |                                        |   |                                                              |                                                        |    |
|---------|------|------------|----------------------------------------|---|--------------------------------------------------------------|--------------------------------------------------------|----|
|         |      |            | ofCognitiveNeuroscienc<br>e            |   |                                                              |                                                        |    |
| 5070126 | 2003 | Binder     | Journal<br>ofCognitiveNeuroscienc<br>e | 5 | LoNon>HiNon                                                  | Cognition.Language.Orthography                         | 7  |
| 5080219 | 2003 | Potenza    | American Journal<br>ofPsychiatry       | 4 | Normal Subjects, Incongruent<br>vs. Congruent, Deactivations | Cognition.Attention                                    | 1  |
| 6080122 | 2003 | Kumari     | Biological Psychiatry                  | 3 | Positive > Reference Picture-<br>Caption Pairs, Controls     | Cognition.Language.Semantics                           | 3  |
| 7080226 | 2003 | Rolls      | European Journal<br>ofNeuroscience     | 3 | Pleasant vs. Unpleasant                                      | Perception.Olfaction                                   | 1  |
| 7120375 | 2003 | Knutson    | NeuroImage                             | 3 | Outcome: Gain vs. No<br>Outcome                              | Emotion,Cognition                                      | 4  |
| 5120253 | 2004 | Ischebeck  | Journal<br>ofCognitiveNeuroscienc<br>e | 6 | Familiar>Pseudoword,<br>LexicalDecision                      | Cognition.Language.Semantics,Cognition.Language.Syntax | 5  |
| 6050047 | 2004 | Ferrarelli | Brain Research Bulletin                | 1 | TMS, Left DLPFC - Rest,<br>Increases                         | Perception.Somesthesis                                 | 4  |
| 7020033 | 2004 | Pierce     | Brain                                  | 2 | FamiliarFaces, Controls                                      | Perception.Vision.Shape,Emotion                        | 25 |
| 7090249 | 2004 | Phelps     | Neuron                                 | 2 | CS- > CS+, Acquisition                                       | Cognition.Attention                                    | 8  |
| 7090249 | 2004 | Phelps     | Neuron                                 | 6 | CS- > CS+, Extinction Day 2                                  | Cognition.Attention                                    | 11 |
| 7120357 | 2004 | Bjork      | Journal ofNeuroscience                 | 5 | Gain vs. Non-Gain Outcome,<br>Adults                         | Emotion,Cognition                                      | 16 |
| 7120357 | 2004 | Bjork      | Journal ofNeuroscience                 | 7 | Loss vs. Non-Loss Outcome,<br>Adults                         | Emotion,Cognition                                      | 6  |
| 7120377 | 2004 | Knutson    | Neuron                                 | 3 | Loss vs. Nonloss Anticipation,<br>Placebo                    | Emotion,Cognition                                      | 3  |
| 8050118 | 2004 | Brown      | Neuroreport                            | 1 | Music Listening - Rest                                       | Perception.Audition,Emotion,Cognition.Music            | 21 |
| 8080200 | 2004 | Kawabata   | Journal<br>ofNeurophysiology           | 5 | Beautiful vs. Neutral                                        | Perception.Vision,Emotion                              | 3  |
| 9020049 | 2004 | Rilling    | Neuroreport                            | 1 | Cooperate,<br>Cooperate>Cooperate, Defect                    | Emotion,Cognition                                      | 11 |
| 9030063 | 2004 | Kerr       | Neuroreport                            | 2 | Brain Deactivation During<br>Read Task                       | Action.Execution.Speech,Cognition.Language.Speech      | 21 |
| 5080207 | 2005 | Wraga      | Neuropsychologia                       | 2 | Object Task, Deactivations                                   | Cognition.Space,Perception.Vision.Shape,Cognition.Soma | 13 |
| 6080138 | 2005 | Napadow    | Human Brain Mapping                    | 2 | Manual, Decreases                                            | Perception.Somesthesis                                 | 11 |

|          |      |            |                                 |    |                                                                              |                                               |    |
|----------|------|------------|---------------------------------|----|------------------------------------------------------------------------------|-----------------------------------------------|----|
| 6080138  | 2005 | Napadow    | Human Brain Mapping             | 5  | 2-Hz Electroacupuncture, Decreases                                           | Perception.Somesthesis                        | 9  |
| 6080138  | 2005 | Napadow    | Human Brain Mapping             | 7  | 100-Hz Electroacupuncture, Decreases                                         | Perception.Somesthesis                        | 13 |
| 6110180  | 2005 | Hui        | NeuroImage                      | 1  | DeqiOnly, Deactivations                                                      | Perception.Somesthesis                        | 87 |
| 6110180  | 2005 | Hui        | NeuroImage                      | 4  | Deqi + Pain, Activations                                                     | Perception.Somesthesis.Pain                   | 31 |
| 6110180  | 2005 | Hui        | NeuroImage                      | 6  | Sensory, Activations                                                         | Perception.Somesthesis                        | 58 |
| 7080199  | 2005 | Knutson    | Journal ofNeuroscience          | 4  | Main Effect of Magnitude (Deactivations)                                     | Emotion,Cognition                             | 2  |
| 7080199  | 2005 | Knutson    | Journal ofNeuroscience          | 5  | Main Effect of Probability (Activations)                                     | Emotion,Cognition                             | 4  |
| 7080199  | 2005 | Knutson    | Journal ofNeuroscience          | 7  | Interaction of Valence by Magnitude                                          | Emotion,Cognition                             | 13 |
| 8110279  | 2005 | Kulkami    | European Journal ofNeuroscience | 1  | Interaction Between Pain and Unpleasantness                                  | Perception.Somesthesis.Pain,Emotion           | 9  |
| 9030055  | 2005 | Kuchinke   | NeuroImage                      | 3  | Emotional > Neutral Words                                                    | Emotion                                       | 3  |
| 9030055  | 2005 | Kuchinke   | NeuroImage                      | 7  | Positive > Neutral Words                                                     | Emotion                                       | 4  |
| 10050107 | 2005 | Kuhnen     | Neuron                          | 3  | Market Outcome, Chosen Stock vs. Unchosen Stock Value                        | Cognition,Emotion                             | 6  |
| 10070129 | 2005 | Coricelli  | Nature Neuroscience             | 10 | Influence of Cumulative Experience of Regret (CR) on Choice-Related Activity | Cognition,Emotion                             | 4  |
| 8080208  | 2006 | Britton    | NeuroImage                      | 1  | Faces - Fixation                                                             | Emotion,Perception.Vision.Shape               | 6  |
| 8110297  | 2006 | Ricciardi  | Neuroscience                    | 7  | Visual Maintenance > Tactile Maintenance, Interaction                        | Cognition.Memory.Working,Perception.Vision    | 12 |
| 9090113  | 2006 | Fu         | Cerebral Cortex                 | 7  | SelfUndistorted Feedback> Rest                                               | Cognition.Language.Speech,Perception.Audition | 45 |
| 9090113  | 2006 | Fu         | Cerebral Cortex                 | 8  | SelfDistorted Feedback> Rest                                                 | Cognition.Language.Speech,Perception.Audition | 39 |
| 7070183  | 2007 | Malhi      | Bipolar Disorders               | 3  | Fear vs. Neutral, Normals                                                    | Emotion.Fear                                  | 11 |
| 7100278  | 2007 | Lagopoulos | Neuroreport                     | 1  | Negative Words Associated with a Galvanic Skin Response, Normals             | Emotion,Cognition.Attention                   | 10 |
| 7120387  | 2007 | Kramer     | NeuroImage                      | 5  | Win> Loss                                                                    | Emotion,Cognition                             | 15 |
| 8010031  | 2007 | Rilling    | Biological Psychiatry           | 11 | Choice Cooperation - Choice Defect, Psychopathy Negative                     | Emotion,Cognition.Reasoning                   | 5  |

|          |      |                |                                                 |    | Correlation                                                      |                                                         |    |
|----------|------|----------------|-------------------------------------------------|----|------------------------------------------------------------------|---------------------------------------------------------|----|
| 8010032  | 2007 | Rolls          | European Journal of Neuroscience                | 2  | Chocolate in Mouth Only, Cravers vs. Non-Cravers                 | Perception.Gustation,Emotion                            | 1  |
| 8040107  | 2007 | Bjork          | Behavioural Brain Research                      | 1  | Anticipation: No Response, Probability 1.0 vs. Probability 0.5   | Emotion,Cognition                                       | 1  |
| 8040108  | 2007 | Samanez-Larkin | Nature Neuroscience                             | 8  | Nonlossvs Loss Outcome, Older Adults                             | Emotion,Cognition                                       | 3  |
| 8050119  | 2007 | Budhani        | NeuroImage                                      | 2  | Rewarded Correct Responses > Punished Reversal Errors            | Cognition,Emotion                                       | 4  |
| 9010027  | 2007 | Winston        | Neuropsychologia                                | 4  | High Attractiveness + Low Attractiveness > Medium Attractiveness | Perception.Vision,Emotion                               | 3  |
| 10030022 | 2007 | Chevrier       | Human Brain Mapping                             | 1  | Cognitive Go-Phase Activities                                    | Cognition.Attention,Action.Execution                    | 15 |
| 10030041 | 2007 | Knutson        | Neuron                                          | 1  | Product + Price > Fixation                                       | Cognition,Emotion                                       | 14 |
| 10030041 | 2007 | Knutson        | Neuron                                          | 2  | Price > Fixation                                                 | Cognition,Emotion                                       | 6  |
| 10030041 | 2007 | Knutson        | Neuron                                          | 3  | Choice > Fixation                                                | Cognition,Emotion                                       | 18 |
| 10050105 | 2007 | Kim            | Proceedings of the National Academy of Sciences | 9  | Brain Responses ot Implicit Face Preferences                     | Action.Observation,Cognition.Attention                  | 2  |
| 8040104  | 2008 | Iaria          | Human Brain Mapping                             | 1  | Emotional Processing - Orientation Discrimination                | Emotion                                                 | 15 |
| 9090105  | 2008 | Chandrasekhar  | NeuroImage                                      | 1  | Activations in Response to Regret                                | Emotion,Cognition.Attention,Perception.Somesthesia.Pain | 12 |
| 10010002 | 2008 | Fales          | Biological Psychiatry                           | 10 | Error Trials > Correct Trials, Healthy Controls                  | Cognition.Attention,Emotion                             | 1  |
| 10030016 | 2008 | Bjork          | Addiction                                       | 3  | Reward Cues > Non-Reward Cues, Adolescent Controls               | Cognition,Emotion                                       | 13 |
| 10060120 | 2008 | Knutson        | Neuroreport                                     | 1  | Positive Pictures > Negative Pictures                            | Cognition,Emotion,Interoception.Sexuality               | 14 |
| 9090090  | 2009 | Ballard        | NeuroImage                                      | 1  | Magnitude                                                        | Cognition,Emotion                                       | 3  |
